# Supplementary material for: Multifunctional Portable System Based on Digital Images for In-Situ Detecting of Environmental and Food Samples
Source: MDPI journal article supplement (doi:10.3390/molecules28062465), 2023-03-08
Supplement: s1 [file s1]

# MULTIFUNCTIONAL PORTABLE SYSTEM BASED ON DIGITAL IMAGES FOR IN-SITU DETECTING OF ENVIROMENTAL AND FOOD SAMPLES

Diego Barzallo<sup>1</sup>, Jorge Benavides<sup>2</sup>, Víctor Cerdà<sup>3\*</sup>, Edwin Palacio<sup>1\*</sup>

<sup>1</sup>Environmental Analytical Chemistry Group, University of the Balearic Islands, Palma, Spain.

<sup>2</sup> Department of Electrical and Electronic Engineering, Universidad del Valle, Colombia.

<sup>3</sup>Sciware Systems, Bunyola, Spain.

\*Corresponding authors:

victorcerdamartin@gmail.com

edwin.palacio@uib.es

## Supplementary material

A)

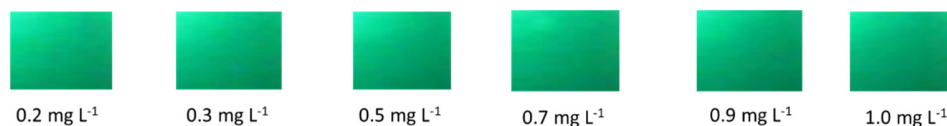

| [NOR]              | Red    |        |        |         |       | Green  |        |        |         |        | Blue   |        |        |         |        |
|--------------------|--------|--------|--------|---------|-------|--------|--------|--------|---------|--------|--------|--------|--------|---------|--------|
| mg L <sup>-1</sup> | 1      | 2      | 3      | Average | SD    | 1      | 2      | 3      | Average | SD     | 1      | 2      | 3      | Average | SD     |
| 0.2                | 0.0578 | 0.0473 | 0.0332 | 0.0461  | 0.012 | 0.0107 | 0.0113 | 0.0102 | 0.0107  | 0.0005 | 0.0103 | 0.0119 | 0.0125 | 0.0116  | 0.0011 |
| 0.3                | 0.0668 | 0.0593 | 0.0788 | 0.0683  | 0.009 | 0.0161 | 0.0158 | 0.0171 | 0.0163  | 0.0007 | 0.0183 | 0.0163 | 0.0192 | 0.0180  | 0.0015 |
| 0.5                | 0.0472 | 0.0521 | 0.0647 | 0.0547  | 0.009 | 0.0215 | 0.0227 | 0.0237 | 0.0227  | 0.0011 | 0.0301 | 0.0295 | 0.0286 | 0.0267  | 0.0008 |
| 0.7                | 0.0521 | 0.0475 | 0.0501 | 0.0499  | 0.002 | 0.0309 | 0.0311 | 0.0323 | 0.0314  | 0.0008 | 0.0353 | 0.0363 | 0.0409 | 0.0358  | 0.0030 |
| 0.9                | 0.0293 | 0.0210 | 0.0255 | 0.0253  | 0.004 | 0.0386 | 0.0366 | 0.0382 | 0.0378  | 0.0011 | 0.0477 | 0.0491 | 0.0485 | 0.0471  | 0.0007 |
| 1                  | 0.0521 | 0.0599 | 0.0570 | 0.0563  | 0.003 | 0.0464 | 0.0454 | 0.0457 | 0.0458  | 0.0005 | 0.0579 | 0.0574 | 0.0541 | 0.0549  | 0.0021 |

B)

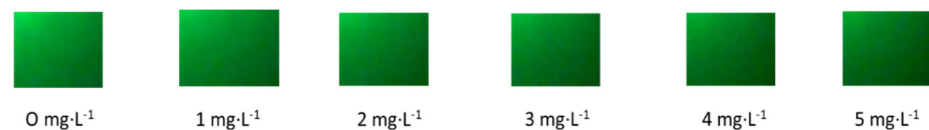

| [Allura Red]<br>mg·L <sup>-1</sup> | Webcam System |       |       |       |       |       |       |       |       |       |       |       |       |       |       |
|------------------------------------|---------------|-------|-------|-------|-------|-------|-------|-------|-------|-------|-------|-------|-------|-------|-------|
|                                    | Red           |       |       |       |       | Green |       |       |       |       | Blue  |       |       |       |       |
|                                    | 1             | 2     | 3     | Avg   | SD    | 1     | 2     | 3     | Avg   | SD    | 1     | 2     | 3     | Avg   | SD    |
| 0                                  | 0.00          | 0.00  | 0.00  | 0.000 | 0.000 | 0.00  | 0.00  | 0.00  | 0.000 | 0.000 | 0.00  | 0.00  | 0.00  | 0.000 | 0.000 |
| 1                                  | 0.006         | 0.006 | 0.008 | 0.007 | 0.001 | 0.031 | 0.030 | 0.030 | 0.030 | 0.000 | 0.047 | 0.044 | 0.046 | 0.046 | 0.001 |
| 2                                  | 0.091         | 0.073 | 0.082 | 0.082 | 0.009 | 0.062 | 0.060 | 0.060 | 0.061 | 0.001 | 0.097 | 0.094 | 0.092 | 0.094 | 0.002 |
| 3                                  | 0.061         | 0.045 | 0.025 | 0.044 | 0.018 | 0.074 | 0.071 | 0.071 | 0.072 | 0.002 | 0.135 | 0.129 | 0.132 | 0.132 | 0.003 |
| 4                                  | 0.176         | 0.161 | 0.180 | 0.172 | 0.010 | 0.115 | 0.111 | 0.111 | 0.112 | 0.002 | 0.181 | 0.176 | 0.176 | 0.178 | 0.003 |
| 5                                  | 0.214         | 0.178 | 0.187 | 0.193 | 0.019 | 0.139 | 0.137 | 0.137 | 0.138 | 0.001 | 0.205 | 0.206 | 0.201 | 0.204 | 0.002 |

**Figure S1.** Images obtained by performing absorbance measurements. A) Data obtained with norfloxacin standards using webcam system B) Data obtained with allura red standards using webcam system.

A)

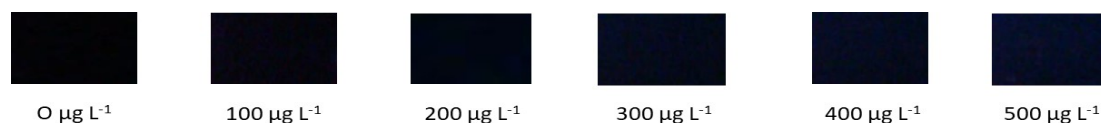

| [Quinine]<br>µg·L <sup>-1</sup> | Webcam System |      |      |      |      |       |       |       |       |      |       |       |       |       |      |
|---------------------------------|---------------|------|------|------|------|-------|-------|-------|-------|------|-------|-------|-------|-------|------|
|                                 | Red           |      |      |      |      | Green |       |       |       |      | Blue  |       |       |       |      |
|                                 | 1             | 2    | 3    | Avg  | SD   | 1     | 2     | 3     | Avg   | SD   | 1     | 2     | 3     | Avg   | SD   |
| 0                               | 2.24          | 2.25 | 2.22 | 2.24 | 0.02 | 4.75  | 4.69  | 4.77  | 5.04  | 0.04 | 5.84  | 5.99  | 5.91  | 5.92  | 0.07 |
| 100                             | 2.97          | 2.91 | 2.77 | 2.88 | 0.10 | 5.64  | 5.64  | 5.63  | 5.64  | 0.01 | 14.5  | 14.36 | 14.33 | 14.4  | 0.09 |
| 200                             | 3.08          | 3.31 | 3.48 | 3.29 | 0.20 | 7.26  | 7.23  | 7.28  | 7.26  | 0.03 | 19.99 | 20.35 | 20.13 | 20.16 | 0.18 |
| 300                             | 3.34          | 3.34 | 3.28 | 3.32 | 0.03 | 9.14  | 9.26  | 9.19  | 9.2   | 0.06 | 27.4  | 27.22 | 27.01 | 27.21 | 0.19 |
| 400                             | 3.14          | 3.33 | 3.29 | 3.25 | 0.10 | 11.74 | 11.69 | 11.81 | 11.75 | 0.06 | 37.35 | 37.39 | 37.52 | 37.42 | 0.09 |
| 500                             | 3.31          | 3.13 | 3.22 | 3.27 | 0.06 | 13.96 | 14.11 | 14.11 | 14.06 | 0.09 | 46.49 | 46.32 | 46.86 | 46.56 | 0.28 |

B)

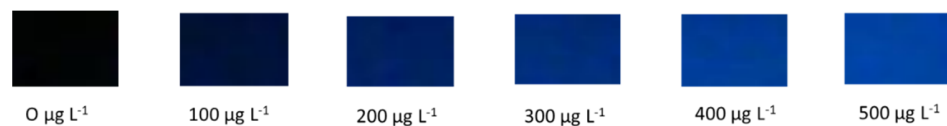

| [Quinine]<br>$\mu\text{g}\cdot\text{L}^{-1}$ | Webcam system |      |      |      |      |       |       |       |       |      |        |        |        |        |      |
|----------------------------------------------|---------------|------|------|------|------|-------|-------|-------|-------|------|--------|--------|--------|--------|------|
|                                              | Red           |      |      |      |      | Green |       |       |       |      | Blue   |        |        |        |      |
|                                              | 1             | 2    | 3    | Avg  | SD   | 1     | 2     | 3     | Avg   | SD   | 1      | 2      | 3      | Avg    | SD   |
| 0                                            | 1.19          | 1.28 | 1.34 | 1.27 | 0.08 | 4.15  | 4.11  | 4.23  | 4.16  | 0.06 | 7.01   | 6.84   | 7      | 6.95   | 0.10 |
| 100                                          | 0.96          | 0.84 | 0.69 | 0.83 | 0.14 | 15.44 | 15.42 | 15.46 | 15.44 | 0.02 | 47.93  | 47.75  | 47.93  | 47.87  | 0.10 |
| 200                                          | 0.45          | 0.44 | 0.43 | 0.44 | 0.01 | 28.52 | 28.58 | 28.64 | 28.58 | 0.06 | 78.96  | 78.12  | 78.86  | 78.65  | 0.46 |
| 300                                          | 0.17          | 0.2  | 0.18 | 0.18 | 0.02 | 42.26 | 41.48 | 41.36 | 41.70 | 0.49 | 111.09 | 113.63 | 113.23 | 112.65 | 1.37 |
| 400                                          | 0.1           | 0.12 | 0.11 | 0.11 | 0.01 | 54.13 | 54.2  | 54.01 | 54.11 | 0.1  | 135.6  | 135.74 | 135.47 | 135.60 | 0.14 |
| 500                                          | 0.09          | 0.1  | 0.1  | 0.10 | 0.01 | 66.43 | 66.48 | 66.38 | 66.43 | 0.05 | 161.77 | 161.47 | 161.32 | 161.52 | 0.23 |

**Figure S2.** A) Images obtained of quinine standards using radiation with middle current intensity. B) Images obtained of quinine standards using radiation with high current intensity.

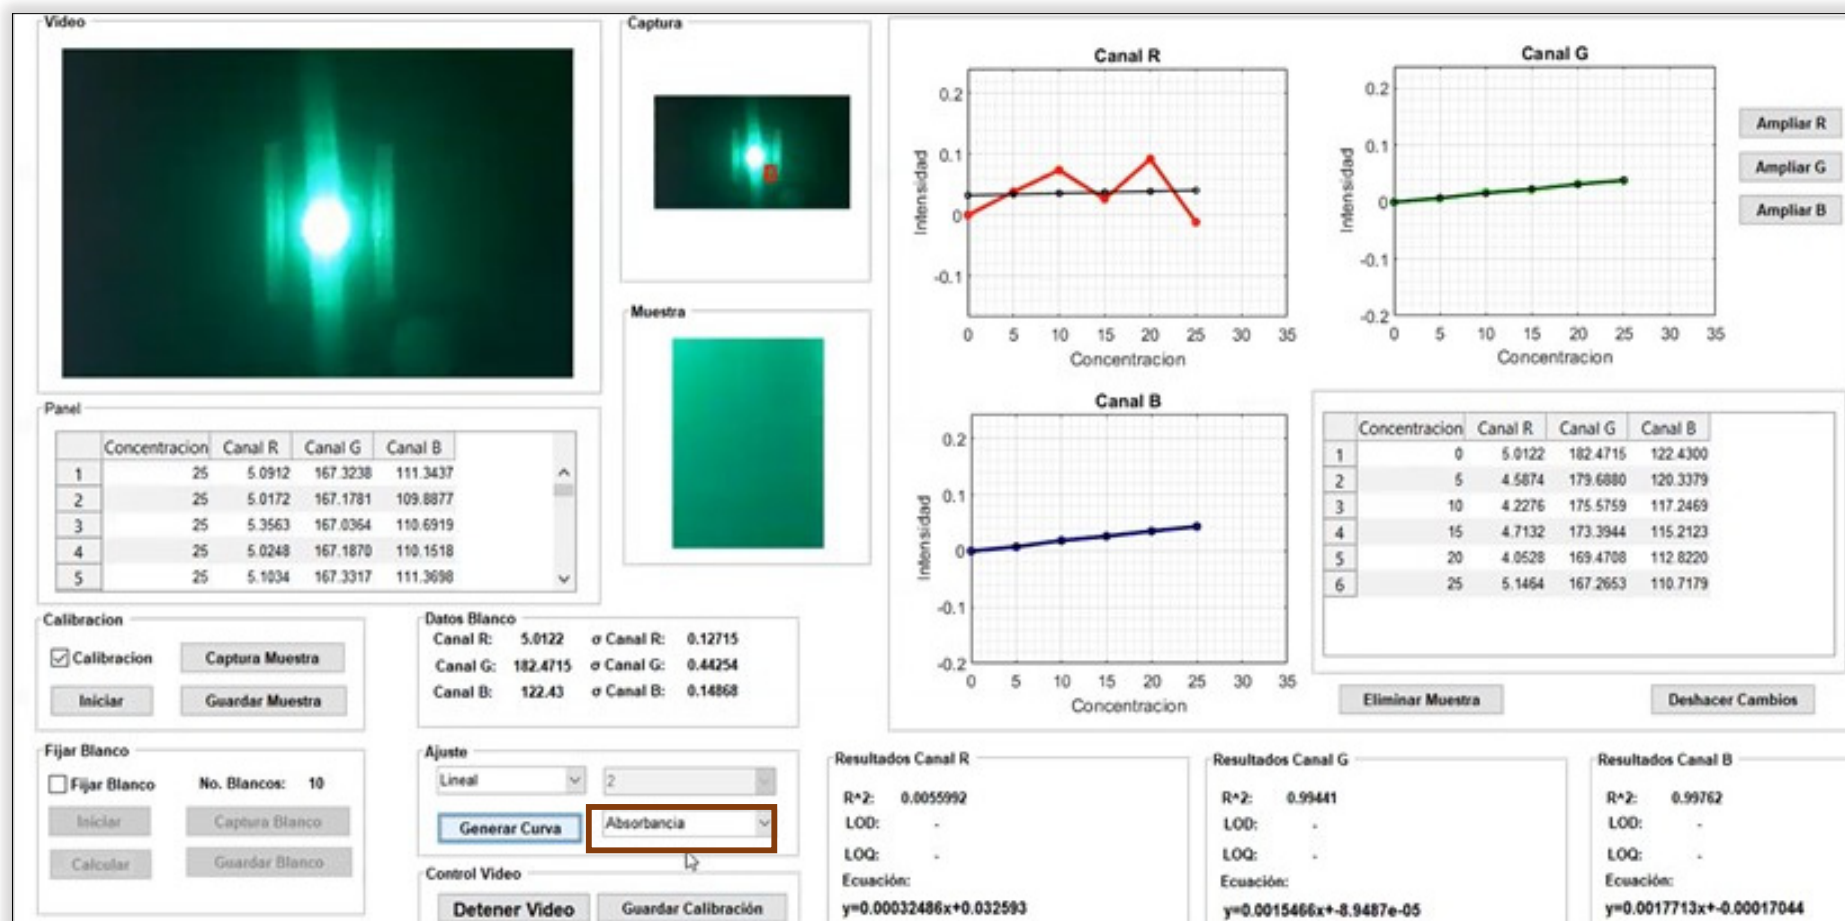

Figure S3. Execution of Matlab software in absorbance measurements. External calibration curve obtained from norfloxacin.

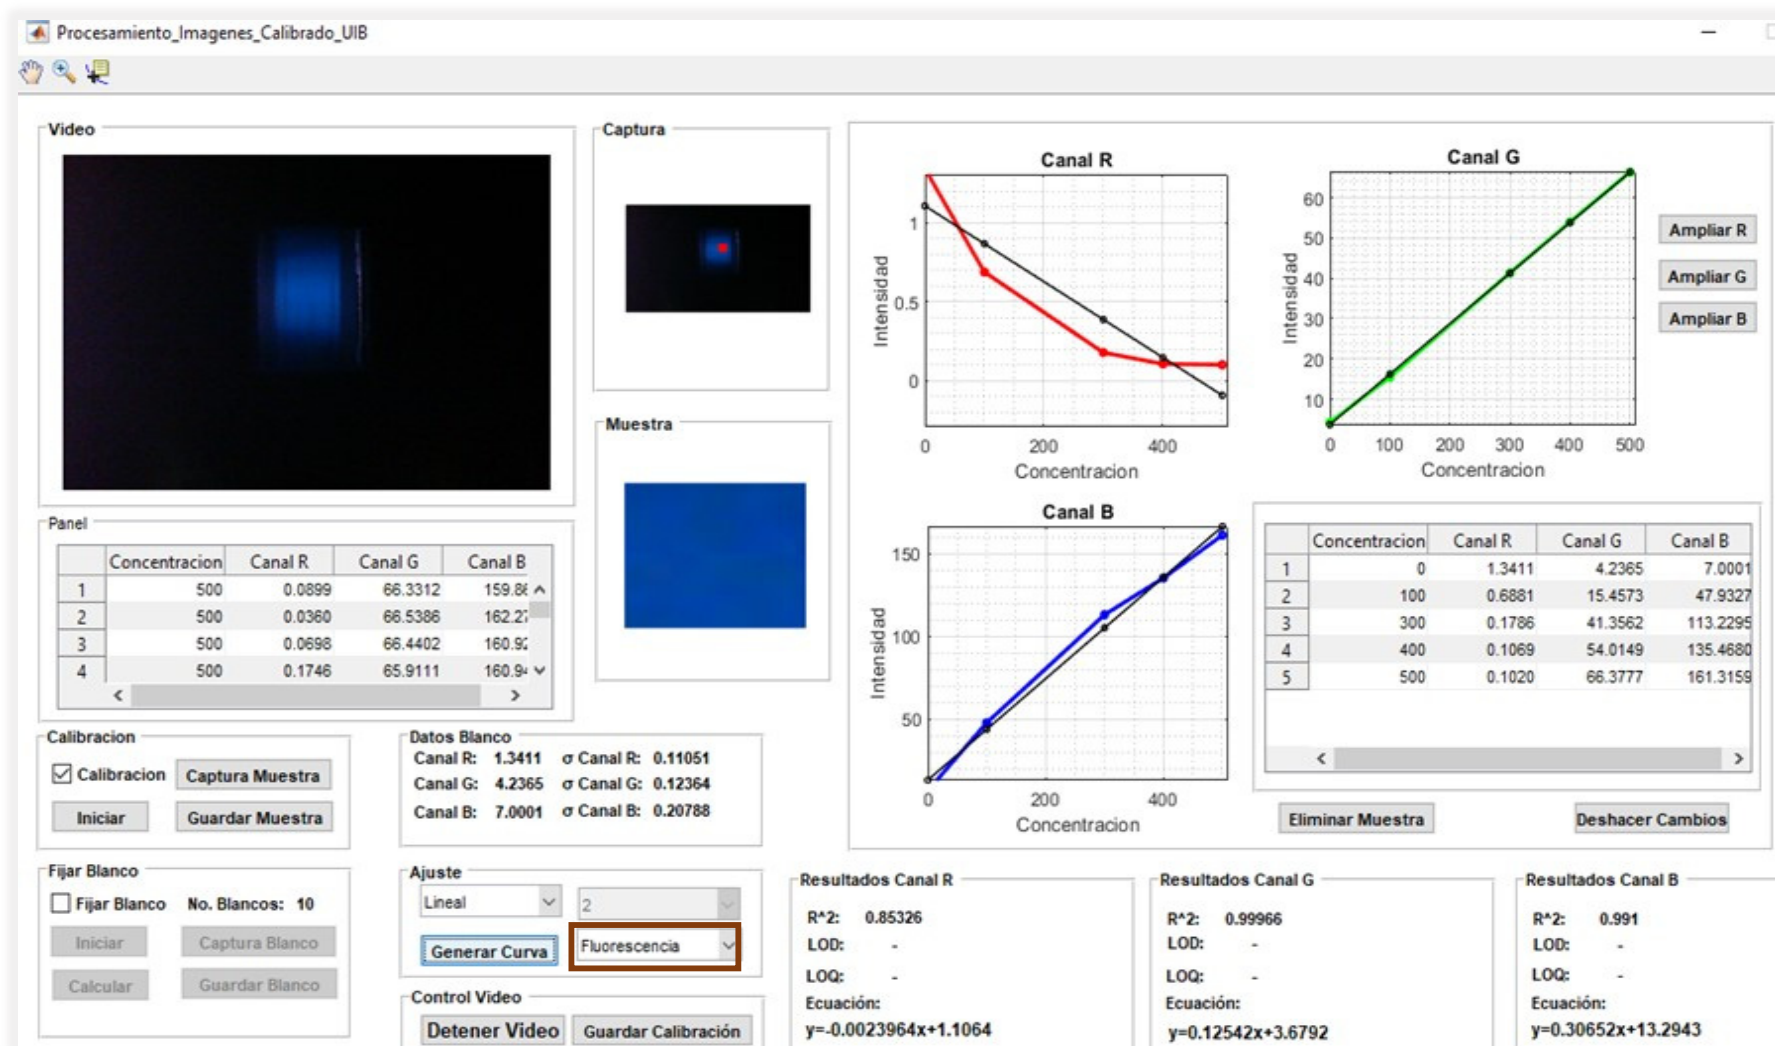

**Figure S4.** Execution of Matlab software in fluorimetric measurements. External calibration curve obtained from quinine sulfate

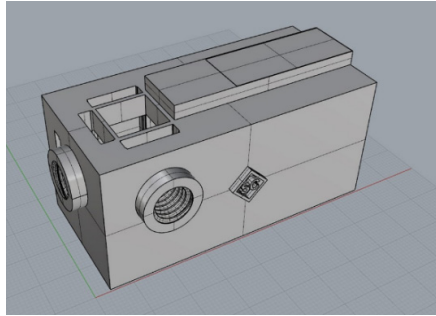

**Figure S5.** Design of 3D Holder using Rhinoceros program

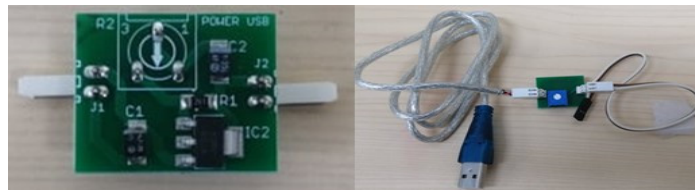

**Figure S6.** Electronic circuitry used for experimentation

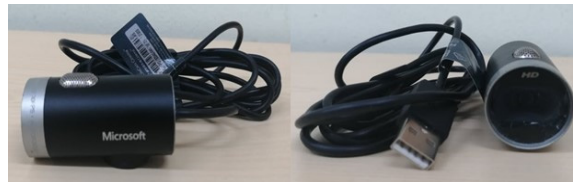

**Figure S7.** Photograph of the used webcam

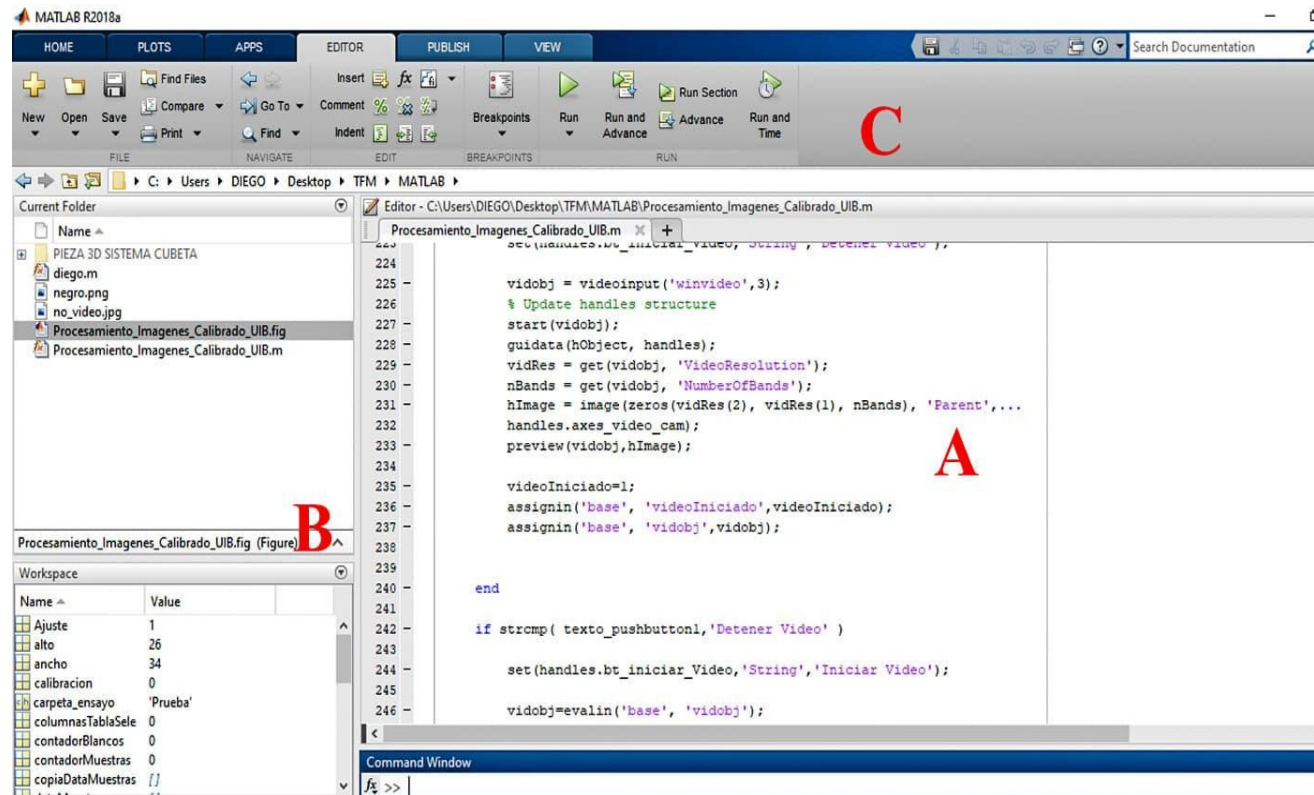

**Figure S8.** Programming language developed in Matlab. A) Command Window, B) Current Folder and Workspace and (C) Menu bar.
